# Supplementary material for: The Early Detection of Osteoporosis in a Cohort of Healthcare Workers: Is There Room for a Screening Program?
Source: MDPI journal article supplement (doi:10.3390/ijerph18031368), 2021-02-02
Supplement: s1 [file s1]

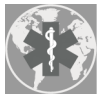

## Annex 1–Pilot study results

**Table S1.** Pilot study population features (N 20).

| Population features.                                      | N (%)       |
|-----------------------------------------------------------|-------------|
| Total                                                     | 20 (100)    |
| Women                                                     | 13 (65)     |
| Man                                                       | 7 (35)      |
| Age                                                       |             |
| < 40                                                      | 5 (25.0)    |
| 40–49                                                     | 7 (35.0)    |
| 50–59                                                     | 5 (25.0)    |
| ≥ 60                                                      | 3 (15.0)    |
| Mean women                                                | 47.2        |
| Mean men                                                  | 44.8        |
| BMI (kg/m <sup>2</sup> ) < 19                             | 5(25.0)     |
| > 19                                                      | 15 (75.0)   |
| Menopause                                                 |             |
| No                                                        | 6 (46.2)    |
| Before 45 years old                                       | 2 (15.4)    |
| After 45 years old                                        | 5 (38.4)    |
| Fragility fracture history                                | 3 (15.0)    |
| Familiarity fragility fracture                            | 3(15.0)     |
| Smoke                                                     | No          |
|                                                           | <10/die     |
|                                                           | >10/die     |
|                                                           | 12 (60.0)   |
|                                                           | 5 (25.0)    |
|                                                           | 3 (15.0)    |
| Immobilization past 6 months                              | 1 (5.0)     |
|                                                           | 15–30 days  |
|                                                           | 31–60 days  |
|                                                           | 61–120 days |
|                                                           | 0 (0.0)     |
|                                                           | 1 (5.0)     |
|                                                           | 0 (0.0)     |
| Sedentary: extremely sedentary lifestyle                  | 4 (20.0)    |
| occasional physical activity                              | 5 (25.0)    |
| regular physical activity                                 | 5 (25.0)    |
| agonistic physical activity                               | 1 (5.0)     |
| Sun exposure: no                                          | 10 (50.0)   |
| no, but taking vitamin D                                  | 8 (40.0)    |
| yes                                                       | 2 (10.0)    |
| 1l/die water high calcium concentration intake (>200mg/l) | 11 (55.0)   |
| Daily intake of food with high calcium content            |             |
| 0 portion                                                 | 3 (15.0)    |
| 1–2 portions                                              | 11 (55.0)   |
| 3 or more portions                                        | 7 (30.0)    |
| Alcohol use (wine/beer/spirits)                           |             |
| 0 glasses                                                 | 13 (65.0)   |
| 1–2 glasses                                               | 5 (25.0)    |
| More than 2                                               | 2 (10.0)    |
| Daily food rich in salt                                   | 4 (20.0)    |
| People declaring regular drug intake in the last 3 months | 7 (30.0)    |
| Number of diseases detected                               | 5           |

**Table S2.** Association analysis between survey-score and Bindex score (N 4).

|                     | Survey score, N. (%) |           |
|---------------------|----------------------|-----------|
|                     | ≥1 and <2            | ≥2        |
| <b>Bindex score</b> |                      |           |
| >0.783              | 1 (50.0)             | 1 (50.0)  |
| ≤0.783              | 0 (00)               | 2 (100.0) |
| <b>Total</b>        | 1 (25.0)             | 3 (75.0)  |

**Annex 2–Criteria for inclusion in PEUS**

|                          | Figure 1. major risk factor.<br>Age > 50 years + 1 or more minor risk factor<br>Age > 65 years                                                                                                                                                                                                              | Male<br>Any age with 1 major risk factor<br>Age > 50 years + 2 or more minor risk factor<br>Age > 70 years                                                                                                                                                                                     |
|--------------------------|-------------------------------------------------------------------------------------------------------------------------------------------------------------------------------------------------------------------------------------------------------------------------------------------------------------|------------------------------------------------------------------------------------------------------------------------------------------------------------------------------------------------------------------------------------------------------------------------------------------------|
| <b>Major risk factor</b> | Menopause<br>Previous fragility fracture<br>Family history of fractures<br>Low body mass index <19<br>Smoking (> 10 cigarettes / day)<br>Premature menopause <45 years<br>Immobilization protracted over time<br>Transplants<br>Diseases associated with osteoporosis<br>Drugs associated with osteoporosis | Previous fragility fracture<br>Family history of fractures<br>Low body mass index <19<br>Smoking (> 10 cigarettes / day)<br>Premature menopause <45 years<br>Immobilization protracted over time<br>Transplants<br>Diseases associated with osteoporosis<br>Drugs associated with osteoporosis |
| <b>Minor risk factor</b> | Smoking (<10 cigarettes / day)<br>Alcohol (3 or more international units / day)<br>Vitamin D deficiency<br>Sedentary lifestyle<br>Reduced calcium intake<br>Excessive sodium intake                                                                                                                         | Smoking (<10 cigarettes / day)<br>Alcohol (3 or more international units / day)<br>Vitamin D deficiency<br>Sedentary lifestyle<br>Reduced calcium intake<br>Excessive sodium intake                                                                                                            |
